# Supplementary material for: Design and application of a tripodal on–off type chemosensor for discriminative and selective detection of Fe2+ ions
Source: Royal Society of Chemistry journal article supplement (doi:10.1039/c8nj00214b), 2018-01-01
Supplement: c8nj00214b1.pdf [file c8nj00214b1.pdf]

# Supplementary Information

## Design and application of tripodal on-off type chemosensor for discriminative and selective detection of Fe<sup>2+</sup> ions

Atika Farhi<sup>a</sup>, Farha Firdaus<sup>b,\*</sup> and Mohammad Shakir<sup>a</sup>

*a) Division of Inorganic Chemistry, Department of Chemistry, Aligarh Muslim University, Aligarh 202002, India*

*b) Chemistry section, women's college, Aligarh Muslim University, Aligarh 202002, India*

| S.No. | Figures caption                                                                                                                                                                                                                                                       | Page No. |
|-------|-----------------------------------------------------------------------------------------------------------------------------------------------------------------------------------------------------------------------------------------------------------------------|----------|
| S1    | Response of chemosensor TIS in human blood serum A) Absorption spectra of TIS on continuous addition of Fe <sup>2+</sup> ions. B) Emission spectra of TIS(20μM) and its complexation with Fe <sup>2+</sup> ions(2equiv.) in the presence of various other metal ions. | 3        |
| S2    | Fluorescence spectra of TIS(20μM) showing quenching phenomenon after complexation with Fe <sup>2+</sup> ions in the presence of 15 other metal ions at room temperature.                                                                                              | 3        |
| S3    | Absorption spectra of TIS(20μM) after addition of increasing concentration of Fe <sup>2+</sup> ions (0-10equiv.) in methanol:water(1:9v/v) medium at room temperature.                                                                                                | 4        |
| S4    | Job's plot of 1:1 complex of chemosensor TIS and Fe <sup>2+</sup> ions.                                                                                                                                                                                               | 5        |
| S5    | Benesi-Hildebrand plot of TIS assuming 1:1 stoichiometry for association between TIS and Fe <sup>2+</sup> ions.                                                                                                                                                       | 5        |
| S6    | Plot for evaluating limit of detection of TIS(20μM) with Fe <sup>2+</sup> .                                                                                                                                                                                           | 6        |

|     |                                                                                                                                                                                                                                                                                                                       |    |
|-----|-----------------------------------------------------------------------------------------------------------------------------------------------------------------------------------------------------------------------------------------------------------------------------------------------------------------------|----|
| S7  | IR spectra of chemosensor TIS.                                                                                                                                                                                                                                                                                        | 7  |
| S8  | $^1\text{H}$ NMR spectra of A) TIS B) $\text{TIS-Fe}^{2+}$ (60 $\mu\text{M}$ ) C) $\text{TIS-Fe}^{2+}$ (120 $\mu\text{M}$ ).                                                                                                                                                                                          | 8  |
| S9  | Mass Spectra of a) TIS and b) $\text{TIS-Fe}^{2+}$ complex.                                                                                                                                                                                                                                                           | 9  |
| S10 | Fluorescence emission response of $\text{TIS-Fe}^{2+}$ (100 $\mu\text{M}$ ) in the presence of different anions (10equiv.) in methanol:water (1:9v/v) medium at pH 7, $\lambda_{\text{ex}}$ =300nm                                                                                                                    | 10 |
| S11 | Reversibility of sensor A) Fluorescence emission spectra of $\text{TIS-Fe}^{2+}$ on introducing increasing amount of sulphide ions(0-3 equiv.) in methanol:water(9:1v/v) media and $\lambda_{\text{ex}}$ =300nm. B) and C) Regeneration of color of $\text{TIS-Fe}^{2+}$ complex after the addition of sulphide ions. | 10 |

8

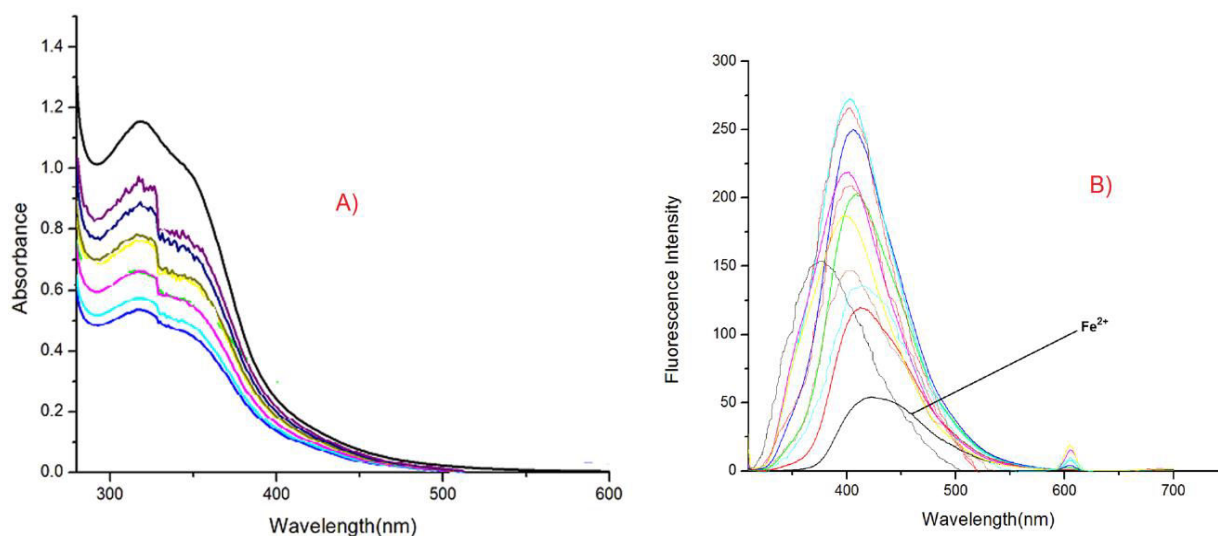

9

**Fig S1:** Response of chemosensor TIS in human blood serum A) Absorption spectra of TIS on continuous addition of  $\text{Fe}^{2+}$  ions. B) Emission spectra of TIS (20  $\mu\text{M}$ ) and its complexation with  $\text{Fe}^{2+}$  ions (2 equiv.) in the presence of various other metal ions.

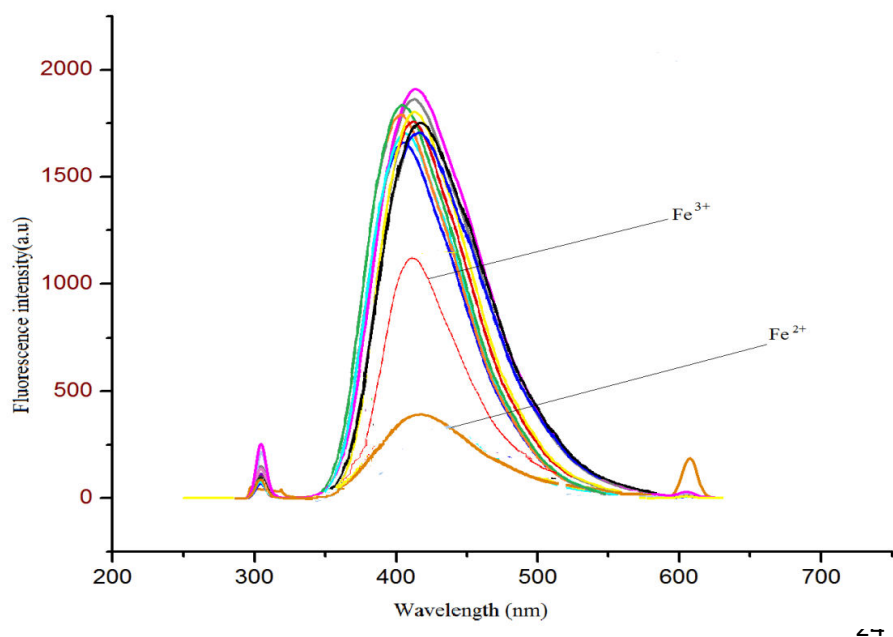

**Fig S2:** Fluorescence spectra of TIS(20μM) showing quenching phenomenon after complexation with Fe<sup>2+</sup> ions in the presence of 15 other metal ions at room temperature.

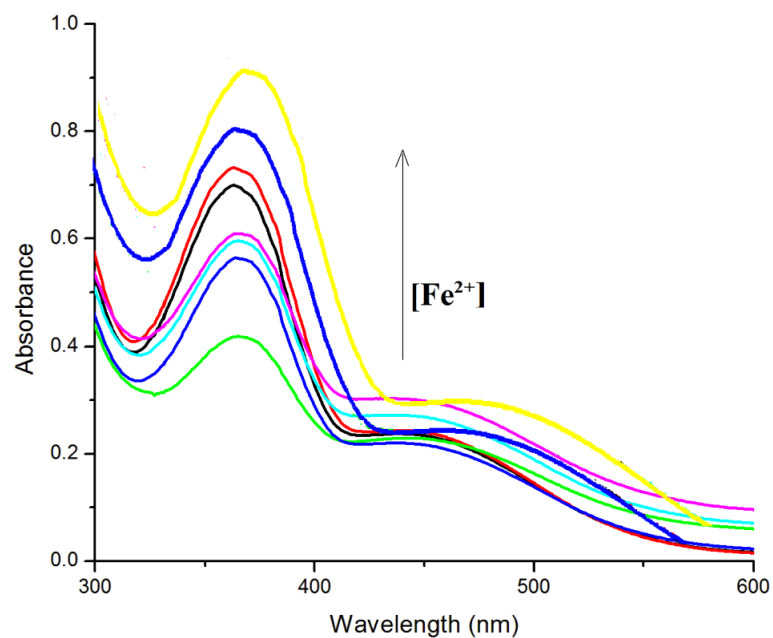

**Fig S3:** Absorption spectra of TIS(20μM) after addition of increasing concentration of Fe<sup>2+</sup>ions (0-10equiv.) in methanol:water(1:9v/v) medium at room temperature.

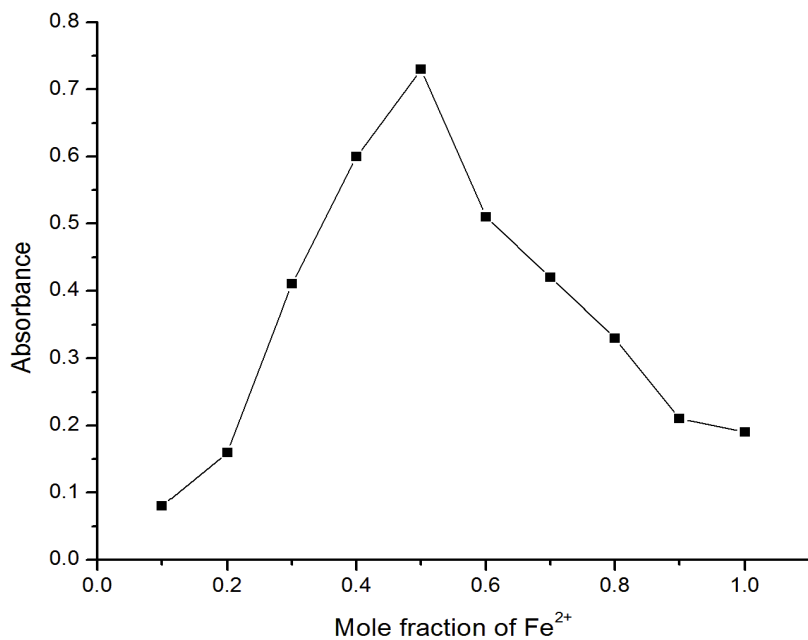

**Fig S4:** Job's plot of 1:1 complex of chemosensor TIS and  $\text{Fe}^{2+}$  ions.

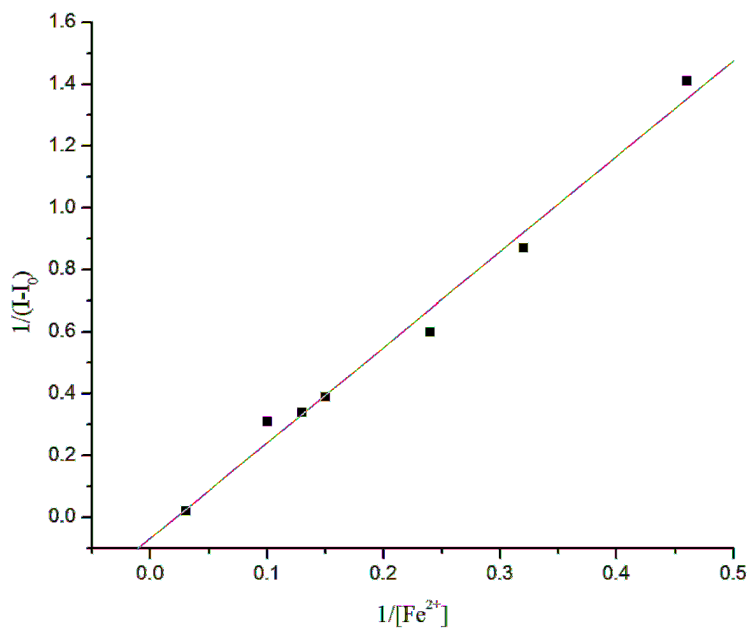

**Fig S5 :** Benesi-Hildebrand plot of TIS assuming 1:1 stoichiometry for association between TIS and  $\text{Fe}^{2+}$  ions.

63

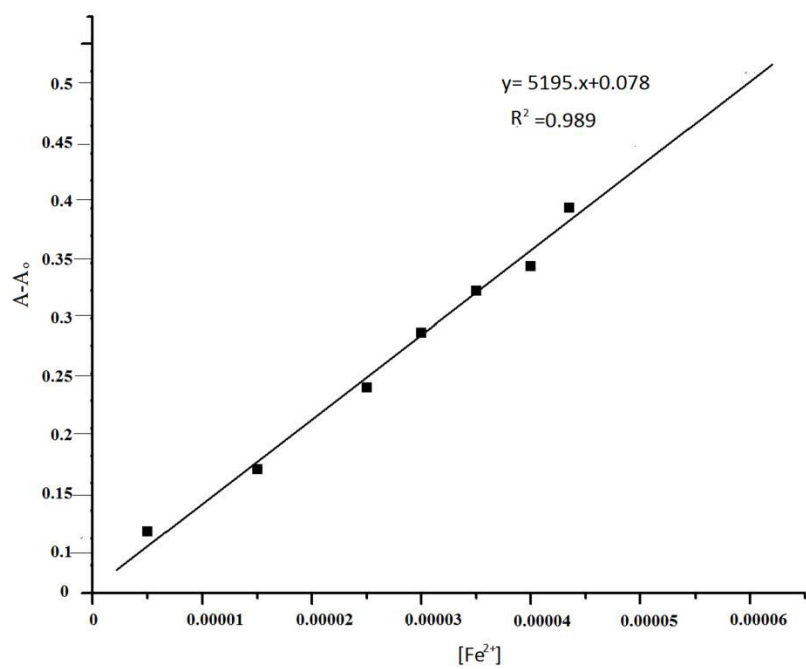

64

65 **Fig S6 :** Plot for evaluating limit of detection of TIS(20 $\mu$ M) with  $Fe^{2+}$ .

66

67

68

69

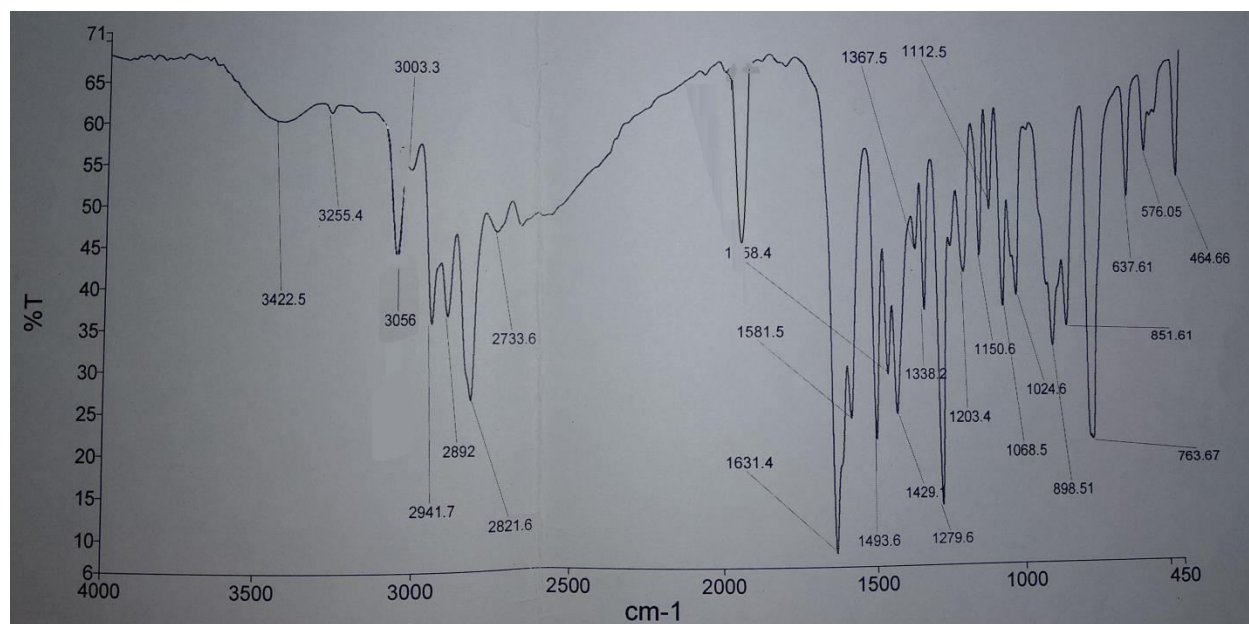

**Fig S7 : IR spectra of chemosensor TIS.**

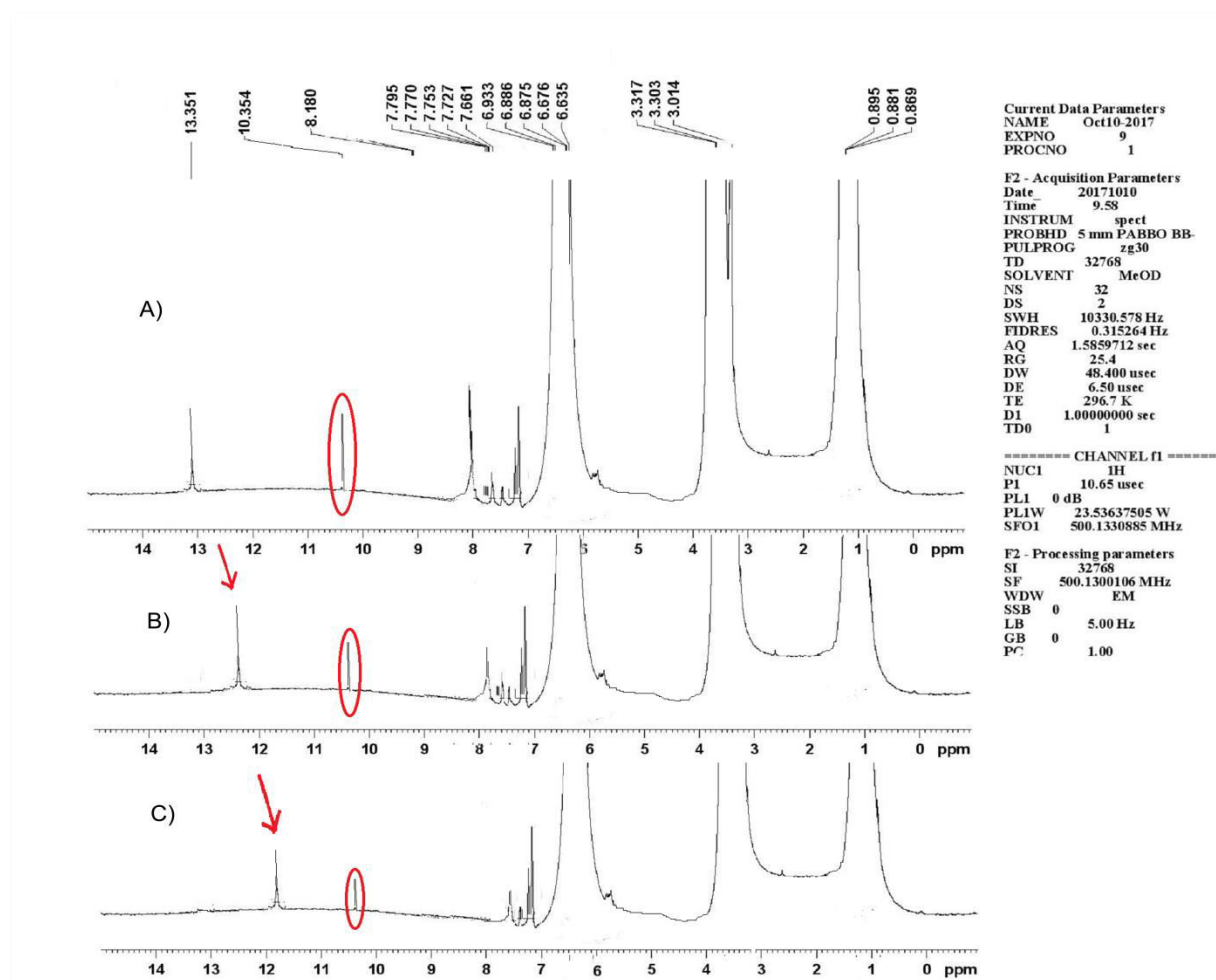

**Fig S8 :**  $^1\text{H}$ NMR spectra of A) TIS B) TIS- $\text{Fe}^{2+}$ (60 $\mu\text{M}$ ) C) TIS- $\text{Fe}^{2+}$ (120  $\mu\text{M}$ ).



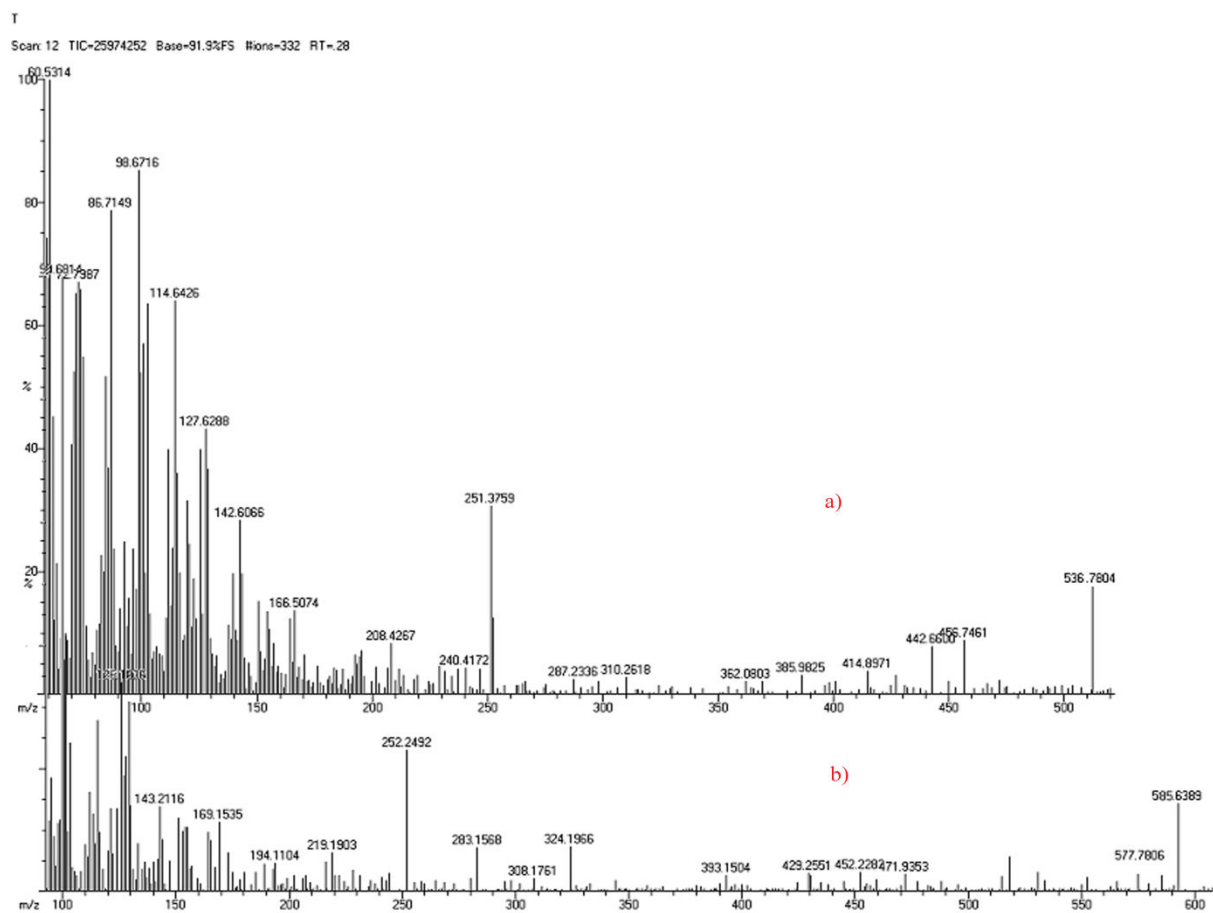

**Fig S9 :** Mass Spectra of a) TIS and b) TIS-Fe<sup>2+</sup> complex.

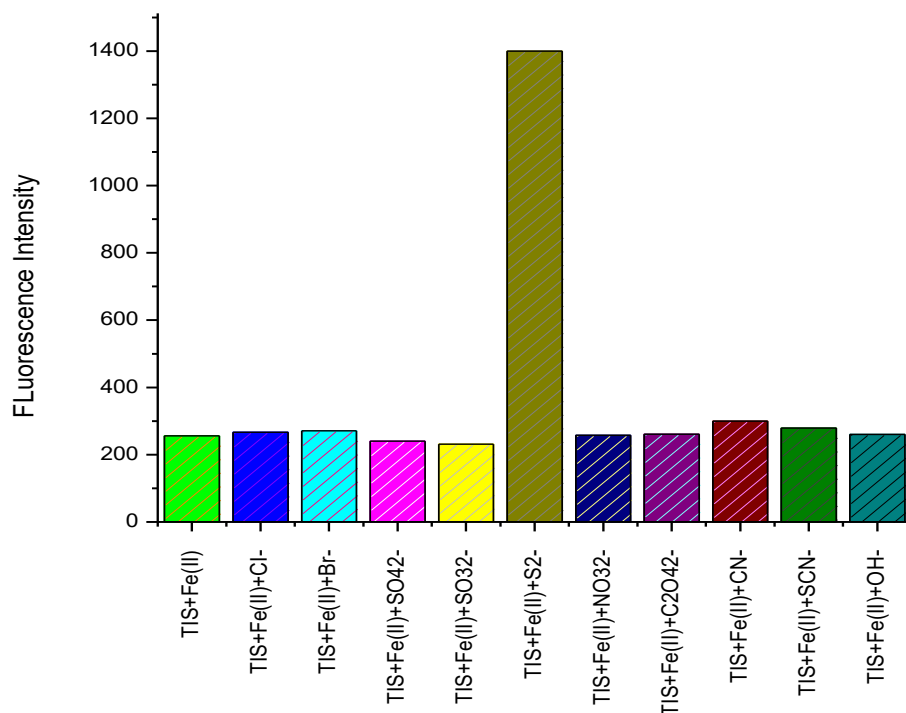

**Fig S10 :** Fluorescence emission response of TIS-Fe<sup>2+</sup> (100 μM) in the presence of different anions (10equiv.) in methanol:water (1:9v/v) medium at pH 7,  $\lambda_{ex}$ =300nm.

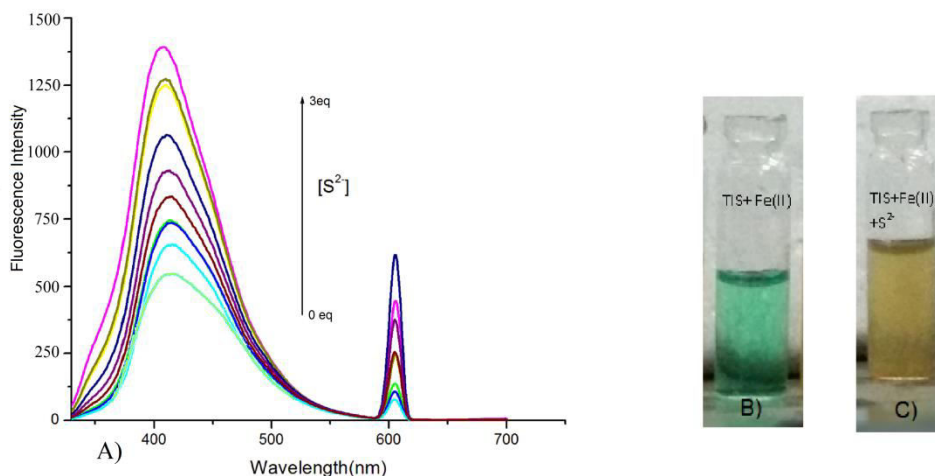

**Fig S11:** Reversibility of sensor A) Fluorescence emission spectra of TIS-Fe<sup>2+</sup> on introducing increasing amount of sulphide ions (0-3 equiv.) in methanol:water (1:9v/v) media and  $\lambda_{ex}$ =300nm. B) and C) Regeneration of color of TIS-Fe<sup>2+</sup> complex after the addition of sulphide ions.
